# Supplementary material for: Mixed cation 2D perovskite: a novel approach for enhanced perovskite solar cell stability
Source: Royal Society of Chemistry journal article supplement (doi:10.1039/d1se01721g), 2022-01-01
Supplement: d1se01721g1.pdf [file d1se01721g1.pdf]

Supporting information

## Mixed Cation 2D Perovskite: A Novel Approach for Enhanced Perovskite Solar Cell Stability

Mousa Abuhelaiqa<sup>1</sup>, Xiao-Xin Gao<sup>1</sup>, Yong Ding<sup>1</sup>, Bin Ding<sup>1</sup>, Zhang Yi<sup>1</sup>, Muhammad Sohail<sup>2</sup>, Hiroyuki Kanda<sup>1\*</sup>, Paul J. Dyson<sup>1\*</sup>, and Mohammad Khaja Nazeeruddin<sup>1\*</sup>

<sup>1</sup>Institute of Chemical Sciences and Engineering, École Polytechnique Fédérale de Lausanne, Valais Wallis, CH-1951 Sion, Switzerland.

<sup>2</sup>Science Department, Texas A&M University at Qatar, Education City, P. O. Box 23874, Doha, Qatar

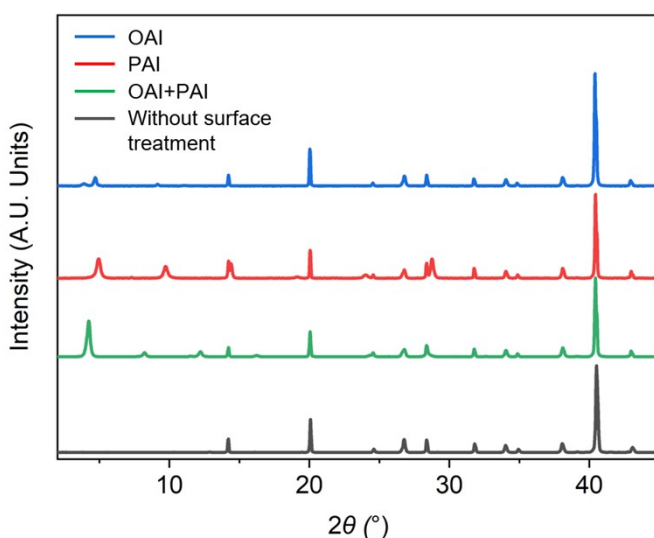

Figure S1. Full XRD spectra for OAI, PAI, OAI+PAI samples, and without surface treatment on the 3D perovskite.

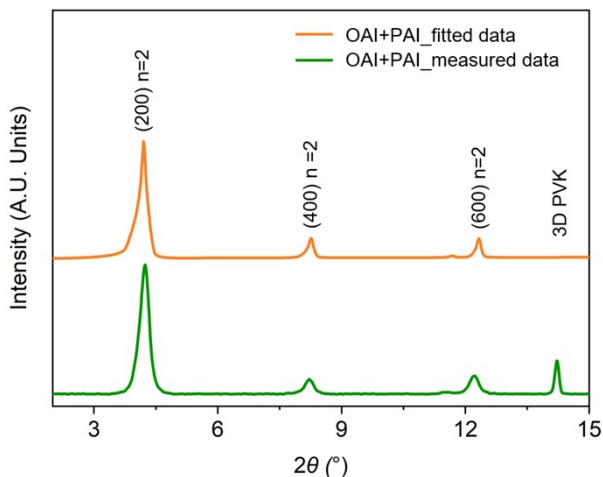

Figure S2. Sample measured and fitted XRD spectra for OAI+PAI.

Table S1. Fitted crystal data for 2D OAI+PAI, OAI, PAI

|                               |              |    |   |          |          |           |
|-------------------------------|--------------|----|---|----------|----------|-----------|
| OAI+PAI                       |              |    |   |          |          |           |
| hkl Phase - 1 Lebail method   |              |    |   |          |          |           |
| R-Bragg                       | 99.961       |    |   |          |          |           |
| Spacegroup                    | Pbca         |    |   |          |          |           |
| Scale                         | 1.60767e-007 |    |   |          |          |           |
| Cell Mass                     | 1.000        |    |   |          |          |           |
| Cell Volume (Å <sup>3</sup> ) | 3520.95291   |    |   |          |          |           |
| Wt% - Rietveld                | 100.000      |    |   |          |          |           |
| Double-Voigt Approach         |              |    |   |          |          |           |
| Cry size Lorentzian           | 194.9        |    |   |          |          |           |
| k: 0.89 LVol-IB (nm)          | 110.417      |    |   |          |          |           |
| k: 0.89 LVol-FWHM (nm)        | 73.443       |    |   |          |          |           |
| Lattice parameters            |              |    |   |          |          |           |
| a (Å)                         | 43.6386405   |    |   |          |          |           |
| b (Å)                         | 9.0124875    |    |   |          |          |           |
| c (Å)                         | 8.9525000    |    |   |          |          |           |
| h                             | k            | l  | m | d        | Th2      | I         |
| 2                             | 0            | 0  | 2 | 21.81932 | 4.04632  | 1.17e+005 |
| 4                             | 0            | 0  | 2 | 10.90966 | 8.09770  | 5.32e+004 |
| 1                             | 1            | 0  | 4 | 8.82622  | 10.01358 | 3.88e-042 |
| 3                             | 1            | 0  | 4 | 7.66119  | 11.54116 | 6.23e+003 |
| 6                             | 0            | 0  | 2 | 7.27311  | 12.15925 | 1.03e+005 |
| 1                             | 1            | 1  | 4 | 6.28525  | 14.07933 | 8.65e-041 |
| 1                             | -1           | -1 | 4 | 6.28525  | 14.07933 | 5.09e-042 |
| 5                             | 1            | 0  | 4 | 6.26969  | 14.11445 | 1.89e-041 |
| 3                             | 1            | 1  | 4 | 5.82079  | 15.20917 | 2.03e-041 |
| 3                             | -1           | -1 | 4 | 5.82079  | 15.20917 | 7.85e-043 |
| 8                             | 0            | 0  | 2 | 5.45483  | 16.23619 | 1.3e-041  |
| 5                             | -1           | -1 | 4 | 5.13554  | 17.25312 | 1.49e-041 |
| 5                             | 1            | 1  | 4 | 5.13554  | 17.25312 | 7.32e-041 |
| 7                             | 1            | 0  | 4 | 5.12704  | 17.28194 | 1.88e-041 |
| 0                             | 2            | 0  | 2 | 4.50624  | 19.68497 | 4.25e-042 |
| 0                             | 0            | 2  | 2 | 4.47625  | 19.81820 | 6.83e-042 |
| 7                             | -1           | -1 | 4 | 4.44909  | 19.94042 | 2.29e-042 |
| 7                             | 1            | 1  | 4 | 4.44909  | 19.94042 | 1.31e-042 |
| 2                             | 2            | 0  | 4 | 4.41311  | 20.10467 | 3.71e-042 |
| 2                             | 0            | -2 | 2 | 4.38493  | 20.23524 | 1.06e-042 |
| 2                             | 0            | 2  | 2 | 4.38493  | 20.23524 | 1.66e-042 |
| 10                            | 0            | 0  | 2 | 4.36386  | 20.33395 | 9.81e-044 |
| 9                             | 1            | 0  | 4 | 4.26999  | 20.78588 | 2.82e-043 |
| OAI                           |              |    |   |          |          |           |
| hkl Phase - 1 Lebail method   |              |    |   |          |          |           |
| R-Bragg                       | 61.680       |    |   |          |          |           |
| Spacegroup                    | Pbca         |    |   |          |          |           |
| Scale                         | 3.35345e-006 |    |   |          |          |           |
| Cell Mass                     | 1.000        |    |   |          |          |           |
| Cell Volume (Å <sup>3</sup> ) | 3492.44104   |    |   |          |          |           |
| Wt% - Rietveld                | 100.000      |    |   |          |          |           |
| Double-Voigt Approach         |              |    |   |          |          |           |

|                        |            |
|------------------------|------------|
| Cry size Lorentzian    | 24.3       |
| k: 1 LVol-IB (nm)      | 15.445     |
| k: 0.89 LVol-FWHM (nm) | 21.592     |
| Lattice parameters     |            |
| a (Å)                  | 44.9283527 |
| b (Å)                  | 9.3781457  |
| c (Å)                  | 8.2887991  |

| h  | k  | l  | m | d        | Th2      | I         |
|----|----|----|---|----------|----------|-----------|
| 2  | 0  | 0  | 2 | 22.46418 | 3.93012  | 572       |
| 4  | 0  | 0  | 2 | 11.23209 | 7.86488  | 1.5e-010  |
| 1  | 1  | 0  | 4 | 9.18028  | 9.62645  | 3.88e-042 |
| 3  | 1  | 0  | 4 | 7.94834  | 11.12288 | 27        |
| 6  | 0  | 0  | 2 | 7.48806  | 11.80895 | 6.21e-022 |
| 5  | 1  | 0  | 4 | 6.48814  | 13.63693 | 1.89e-041 |
| 1  | -1 | -1 | 4 | 6.15216  | 14.38550 | 6.79e-018 |
| 1  | 1  | 1  | 4 | 6.15216  | 14.38550 | 1.18e-043 |
| 3  | -1 | -1 | 4 | 5.73691  | 15.43288 | 1.04e-029 |
| 3  | 1  | 1  | 4 | 5.73691  | 15.43288 | 4.53e-033 |
| 8  | 0  | 0  | 2 | 5.61604  | 15.76711 | 4.24e-030 |
| 7  | 1  | 0  | 4 | 5.29665  | 16.72450 | 1.49e-041 |
| 5  | -1 | -1 | 4 | 5.10907  | 17.34319 | 7.32e-041 |
| 5  | 1  | 1  | 4 | 5.10907  | 17.34319 | 1.88e-041 |
| 0  | 2  | 0  | 2 | 4.68907  | 18.91026 | 4.25e-042 |
| 2  | 2  | 0  | 4 | 4.59014  | 19.32169 | 6.83e-042 |
| 10 | 0  | 0  | 2 | 4.49284  | 19.74431 | 2.29e-042 |
| 7  | 1  | 1  | 4 | 4.46322  | 19.87667 | 2.29e-042 |
| 7  | -1 | -1 | 4 | 4.46322  | 19.87667 | 3.71e-042 |
| 9  | 1  | 0  | 4 | 4.40662  | 20.13459 | 1.06e-042 |
| 4  | 2  | 0  | 4 | 4.32714  | 20.50839 | 1.66e-042 |
| 0  | 0  | 2  | 2 | 4.14440  | 21.42311 | 9.81e-044 |

PAI

hkl Phase - 1 Lebail method

|                               |              |
|-------------------------------|--------------|
| R-Bragg                       | 99.968       |
| Spacegroup                    | Pbca         |
| Scale                         | 1.37335e-009 |
| Cell Mass                     | 1.000        |
| Cell Volume (Å <sup>3</sup> ) | 3179.97927   |
| Wt% - Rietveld                | 100.000      |
| Double-Voigt\Approach         |              |
| Cry size Lorentzian           | 67.3         |
| k: 1 LVol-IB (nm)             | 42.845       |
| k: 0.89 LVol-FWHM (nm)        | 59.898       |
| Lattice parameters            |              |
| a (Å)                         | 37.7212996   |
| b (Å)                         | 9.1905125    |
| c (Å)                         | 9.1727152    |

| h | k  | l  | m | d        | Th2      | I         |
|---|----|----|---|----------|----------|-----------|
| 2 | 0  | 0  | 2 | 18.86065 | 4.68140  | 1.42e+007 |
| 4 | 0  | 0  | 2 | 9.43032  | 9.37063  | 3.16e+007 |
| 1 | 1  | 0  | 4 | 8.92930  | 9.89769  | 8.48e-042 |
| 3 | 1  | 0  | 4 | 7.41978  | 11.91801 | 1.48e-041 |
| 1 | 1  | 1  | 4 | 6.39829  | 13.82935 | 5.16e-035 |
| 1 | -1 | -1 | 4 | 6.39829  | 13.82935 | 5.99e-035 |
| 6 | 0  | 0  | 2 | 6.28688  | 14.07566 | 7.03e+007 |

|   |    |    |   |         |          |           |
|---|----|----|---|---------|----------|-----------|
| 5 | 1  | 0  | 4 | 5.83123 | 15.18177 | 5.81e-042 |
| 3 | -1 | -1 | 4 | 5.76875 | 15.34718 | 1.89e-041 |
| 3 | 1  | 1  | 4 | 5.76875 | 15.34718 | 7.77e-042 |
| 5 | -1 | -1 | 4 | 4.92103 | 18.01130 | 1.14e-041 |
| 5 | 1  | 1  | 4 | 4.92103 | 18.01130 | 1.56e-040 |
| 8 | 0  | 0  | 2 | 4.71516 | 18.80467 | 4.53e-043 |
| 7 | 1  | 0  | 4 | 4.64860 | 19.07642 | 1.66e-042 |
| 0 | 2  | 0  | 2 | 4.59526 | 19.29998 | 2.29e-042 |
| 0 | 0  | 2  | 2 | 4.58636 | 19.33779 | 1.07e-042 |
| 2 | 2  | 0  | 4 | 4.46465 | 19.87020 | 6.69e-041 |
| 2 | 0  | -2 | 2 | 4.45649 | 19.90697 | 1.31e-042 |
| 2 | 0  | 2  | 2 | 4.45649 | 19.90697 | 1.34e-042 |

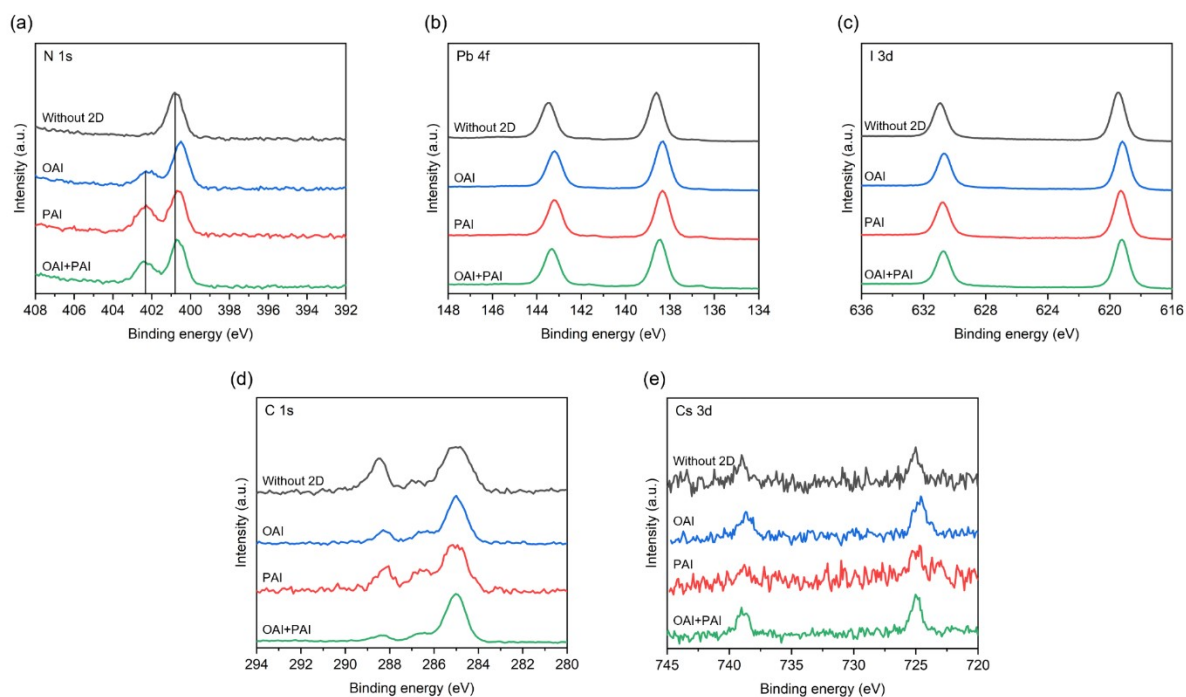

Figure S3. XPS spectra of (a) N 1s, (b) Pb 4f, (c) I 3d, (d) C 1s, and (e) Cs 3d for the 2D/3D samples. The 3D perovskite sample without 2D layer was used as a reference.

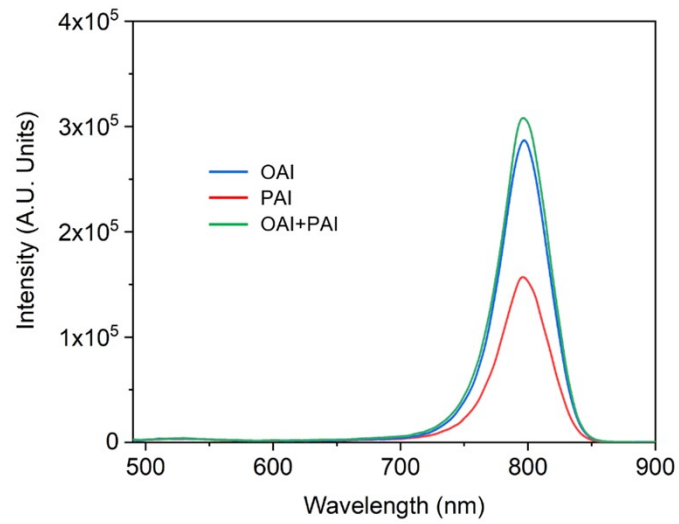

Figure S4. PL emission spectra for OAI, PAI, and OAI+PAI samples. The incident emission laser is from the glass side.

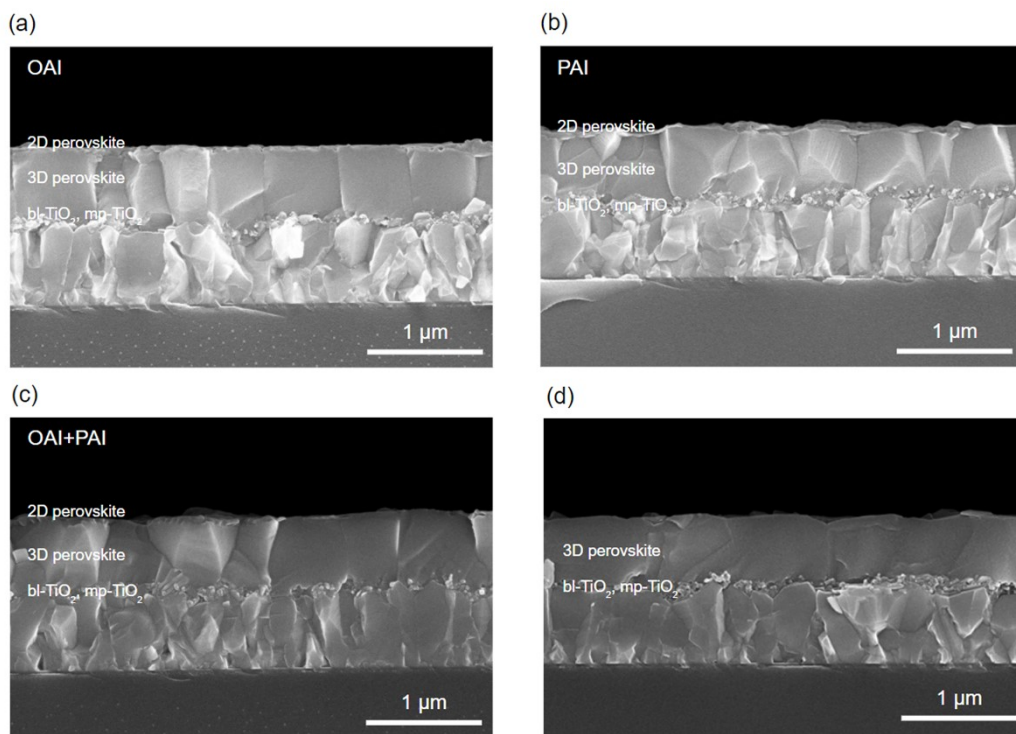

Figure S5: Cross-sectional scanning electron microscopy of the (a) OAI, (b) PAI, (c) OAI+PAI, and **(d) without surface treatment on the 3D perovskite.**

Table S2: TRLP parameters for the 2D/3D samples **and without treatment**.

|                           | $A_1$ | $t_1$ | $A_2$ | $t_2$  |
|---------------------------|-------|-------|-------|--------|
|                           | [-]   | [ns]  | [-]   | [ns]   |
| OAI                       | 0.273 | 167.9 | 0.630 | 939.6  |
| PAI                       | 0.461 | 128.1 | 0.497 | 574.8  |
| OAI+PAI                   | 0.240 | 160.6 | 0.632 | 979.5  |
| Without surface treatment | 0.161 | 338.6 | 0.654 | 1463.5 |

† The equation for the fitting is  $y = y_0 + A_1 \times \exp(-(x-x_0)/\tau_a) + A_2 \times \exp(-(x-x_0)/\tau_b)$ .

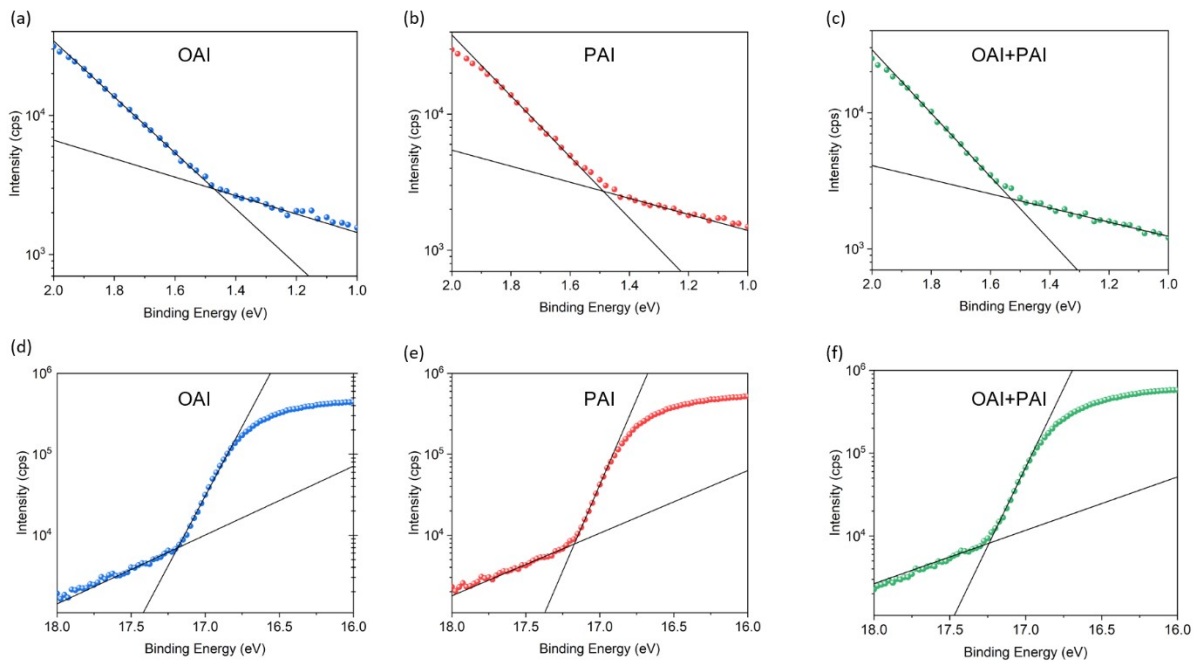

Figure S6. Measurement of the energy band diagram parameters. UPS spectrum edge of work function for (a) OAI, (b) PAI, and (c) OAI+PAI samples. (d) Valence band edge of perovskite layer for (d) PAI, (e) OAI, and (f) OAI+PAI samples.

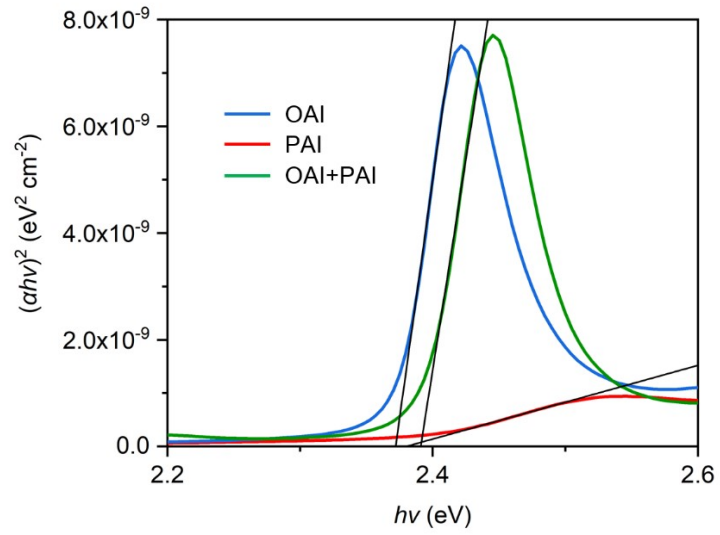

Figure S7. Tauc plot as obtained from UV-VIS to determine the bandgap of (a) OAI, (b) PAI, and (c) OAI+PAI samples.

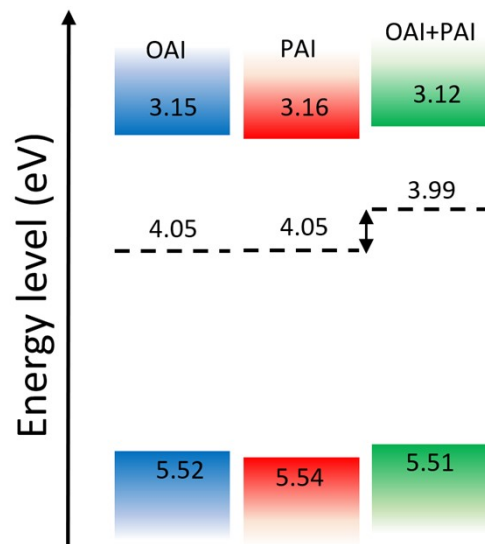

Figure S8. Energy band diagram for OAI, PAI and OAI+PAI samples.

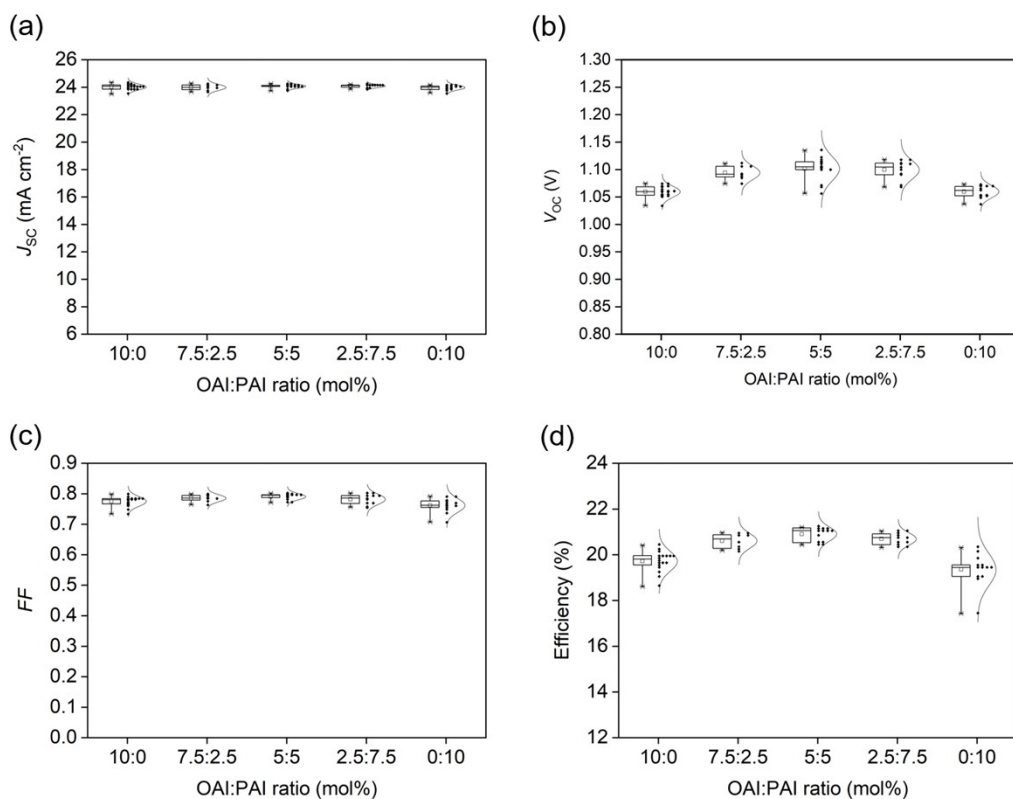

**Figure S9. Statics of the device performance of each condition. The total number of the device was over 50.**

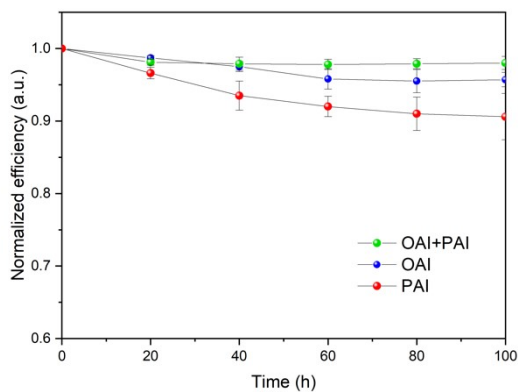

**Figure S10. Stability result for each condition. The stability test was performed by maximum-power point tracking (MPPT) with the condition under AM1.5G with N<sub>2</sub> ambient with 0%RH at 25°C. The total number of devices was two for each condition.**



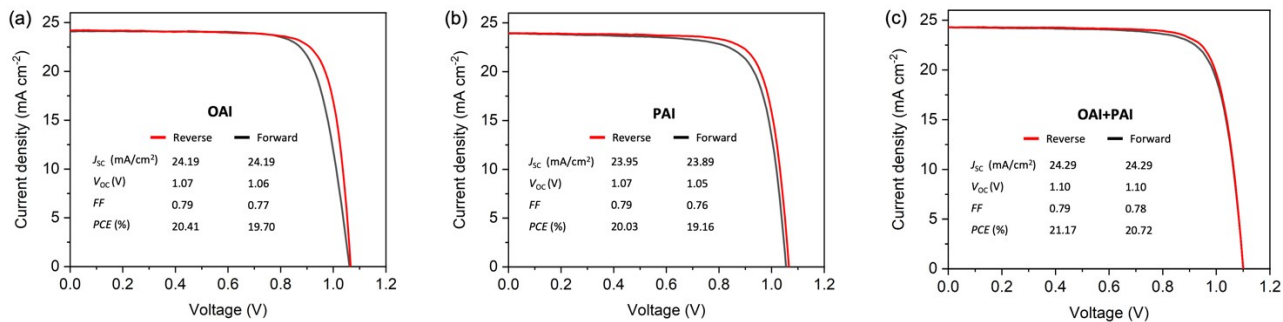

Figure S11. Hysteresis behavior for (a) OAI, (b) PAI and (c) OAI+PAI samples.

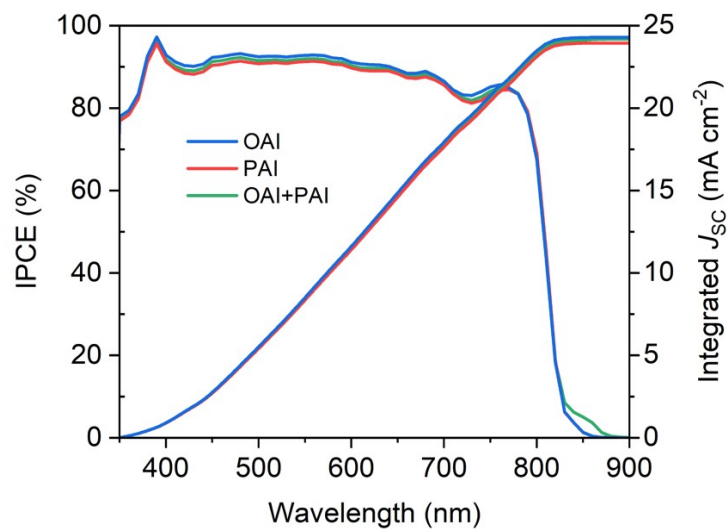

Figure S12. Incident photon to current efficiency (IPCE) for OAI, PAI and OAI+PAI samples.

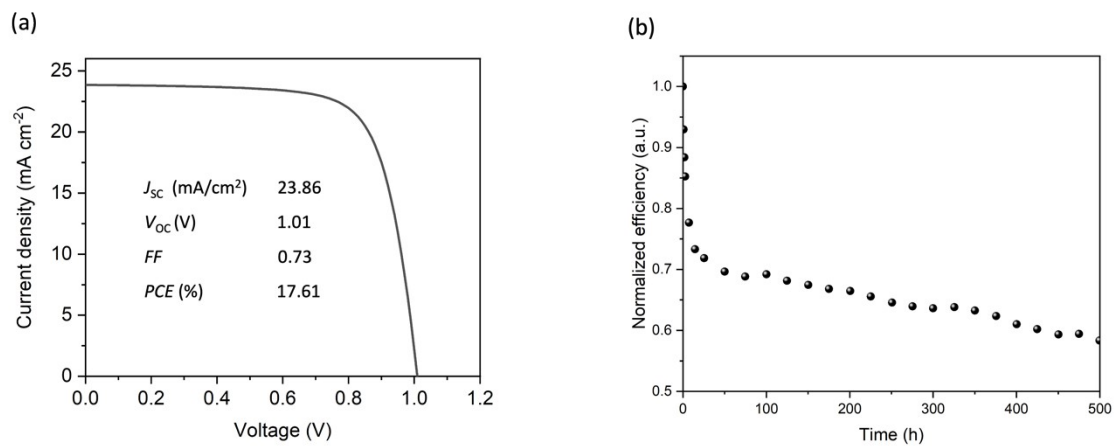

Figure S13. (a) JV characteristic and (b) MPPT stability measurement for PSC devices without 2D perovskite layers at the 3D PVK/HTL interface.
